# Supplementary material for: Trends of global burden of atrial fibrillation/flutter from Global Burden of Disease Study 2017
Source: HighWire-hosted journal article supplement (doi:10.1136/heartjnl-2020-317656), 2020-11-04
Supplement: heartjnl-2020-317656supp001_data_supplement.pdf [file heartjnl-2020-317656supp001_data_supplement.pdf]

## Supplemental materials

Estimated annual percentage changes (EAPC) is a measure of the ASR trend over a time interval, calculated as the method proposed by Hankey. The age-standardised rate (ASR) could be fitted in a regression model:

$$\ln(\text{ASR}) = \alpha + \beta x + \varepsilon.$$

where  $\alpha$  is the intercept term,  $\beta$  is the annual change per 100,000 in the rates,  $x$  is the calendar year,  $\varepsilon$  is the error term.

EAPC is calculated as  $100 \times (\exp(\beta) - 1)$ , and its 95% confidence interval (CI) can also be computed similarly from the linear regression model.

For example, if we want to calculate the EAPC of prevalence of global AF/AFL from 1990 to 2017, we can get the following raw data from GBD 2017. The name of the data frame in R is data:

| measure_name | location_name | sex_name | cause_name                      | metric_name | year | ASR         |
|--------------|---------------|----------|---------------------------------|-------------|------|-------------|
| Prevalence   | Global        | Both     | Atrial fibrillation and flutter | Rate        | 1990 | 507.3233189 |
| Prevalence   | Global        | Both     | Atrial fibrillation and flutter | Rate        | 1994 | 499.4232023 |
| Prevalence   | Global        | Both     | Atrial fibrillation and flutter | Rate        | 1998 | 493.2582504 |
| Prevalence   | Global        | Both     | Atrial fibrillation and flutter | Rate        | 2002 | 489.3763761 |
| Prevalence   | Global        | Both     | Atrial fibrillation and flutter | Rate        | 2006 | 487.7023255 |
| Prevalence   | Global        | Both     | Atrial fibrillation and flutter | Rate        | 2010 | 486.2168861 |
| Prevalence   | Global        | Both     | Atrial fibrillation and flutter | Rate        | 2014 | 483.5037373 |
| Prevalence   | Global        | Both     | Atrial fibrillation and flutter | Rate        | 1993 | 501.3069835 |
| Prevalence   | Global        | Both     | Atrial fibrillation and flutter | Rate        | 1997 | 494.6499164 |
| Prevalence   | Global        | Both     | Atrial fibrillation and flutter | Rate        | 2001 | 489.8149858 |
| Prevalence   | Global        | Both     | Atrial fibrillation and flutter | Rate        | 2005 | 488.310046  |
| Prevalence   | Global        | Both     | Atrial fibrillation and flutter | Rate        | 2009 | 486.6468458 |
| Prevalence   | Global        | Both     | Atrial fibrillation and flutter | Rate        | 2013 | 484.246483  |
| Prevalence   | Global        | Both     | Atrial fibrillation and flutter | Rate        | 2017 | 481.5402806 |
| Prevalence   | Global        | Both     | Atrial fibrillation and flutter | Rate        | 1992 | 503.2165201 |
| Prevalence   | Global        | Both     | Atrial fibrillation and flutter | Rate        | 1996 | 496.1509016 |
| Prevalence   | Global        | Both     | Atrial fibrillation and flutter | Rate        | 2000 | 490.6677486 |
| Prevalence   | Global        | Both     | Atrial fibrillation and flutter | Rate        | 2004 | 488.7743747 |
| Prevalence   | Global        | Both     | Atrial fibrillation and flutter | Rate        | 2008 | 487.0584908 |
| Prevalence   | Global        | Both     | Atrial fibrillation and flutter | Rate        | 2012 | 484.864877  |
| Prevalence   | Global        | Both     | Atrial fibrillation and flutter | Rate        | 2016 | 482.2168474 |

|            |        |      |                                 |      |      |             |
|------------|--------|------|---------------------------------|------|------|-------------|
| Prevalence | Global | Both | Atrial fibrillation and flutter | Rate | 1991 | 505.2268778 |
| Prevalence | Global | Both | Atrial fibrillation and flutter | Rate | 1995 | 497.7465089 |
| Prevalence | Global | Both | Atrial fibrillation and flutter | Rate | 1999 | 491.8607856 |
| Prevalence | Global | Both | Atrial fibrillation and flutter | Rate | 2003 | 489.1214041 |
| Prevalence | Global | Both | Atrial fibrillation and flutter | Rate | 2007 | 487.3211923 |
| Prevalence | Global | Both | Atrial fibrillation and flutter | Rate | 2011 | 485.5297641 |
| Prevalence | Global | Both | Atrial fibrillation and flutter | Rate | 2015 | 482.9377298 |

The R code are like following:

```
#####
```

```
# First, fit a linear model to the year (from 1990 to 2017) and log(ASR):
```

```
fit_model <- glm(log(ASR)~ year, family = gaussian, data)
```

```
# Then we get  $\beta$  parameter of the fitted model:
```

```
coef <- coefficients(fit_model)[2]
```

```
# And get the Confidence Intervals parameter:
```

```
lower25 <- confint(fit_model)[2]
```

```
upper975 <- confint(fit_model)[4]
```

```
# Thus, EAPC and its lower and upper boundary of 95% CI can be computed by:
```

```
eapc_mean <- (exp(coef) - 1)*100
```

```
eapc_lower <- (exp(lower25) - 1)*100
```

```
eapc_upper <- (exp(upper975) - 1)*100
```

```
# using paste0 to combine the result
```

```
EAPC <- paste0(round(eapc_mean,2),'(',round(eapc_lower,2),' to ',round(eapc_upper,2),')')
```

```
#####
```

Reference:

Hankey, B.F., Ries, L.A., Kosary, C.L., Feuer, E.J., Merrill, R.M., Clegg, L.X., Edwards, B.K.,

2000. Partitioning linear trends in age-adjusted rates. *Cancer Cause Control* 11, 31-35.
